# Supplementary material for: Practices and Perceptions of Community Pharmacists in the Management of Atopic Dermatitis: A Systematic Review and Thematic Synthesis
Source: MDPI journal article supplement (doi:10.3390/healthcare11152159), 2023-07-29
Supplement: s1 [file s1]

**Table S1. Detailed search strategy.**

|                                                                                                                                                                                                                                                                                                                                                                                                                                                                                                                                                                                                                                                                                                                                                                                                                                                                                                                                                                                                                                                                                                                                                                                                                                                                                                                                                                                                                                                                                                                                                                                                                                                                                                                                                                                                                                                                                                                                                                                                                                                                                                                                                                                                                                                                                                                                                                                                                                                                                                                                                                                                                                                                                                                                                                                                                                      |
|--------------------------------------------------------------------------------------------------------------------------------------------------------------------------------------------------------------------------------------------------------------------------------------------------------------------------------------------------------------------------------------------------------------------------------------------------------------------------------------------------------------------------------------------------------------------------------------------------------------------------------------------------------------------------------------------------------------------------------------------------------------------------------------------------------------------------------------------------------------------------------------------------------------------------------------------------------------------------------------------------------------------------------------------------------------------------------------------------------------------------------------------------------------------------------------------------------------------------------------------------------------------------------------------------------------------------------------------------------------------------------------------------------------------------------------------------------------------------------------------------------------------------------------------------------------------------------------------------------------------------------------------------------------------------------------------------------------------------------------------------------------------------------------------------------------------------------------------------------------------------------------------------------------------------------------------------------------------------------------------------------------------------------------------------------------------------------------------------------------------------------------------------------------------------------------------------------------------------------------------------------------------------------------------------------------------------------------------------------------------------------------------------------------------------------------------------------------------------------------------------------------------------------------------------------------------------------------------------------------------------------------------------------------------------------------------------------------------------------------------------------------------------------------------------------------------------------------|
| <p><b>Embase (1974 to 2022 December) and Medline (1946 to 2022 December) final search</b></p> <ol style="list-style-type: none"> <li>1. atopic dermatitis.mp.</li> <li>2. eczema.mp.</li> <li>3. dermatitis.mp.</li> <li>4. atopic eczema.mp.</li> <li>5. corticosteroid*.mp.</li> <li>6. emollient*.mp.</li> <li>7. antihistamine*.mp.</li> <li>8. calcineurin inhibitor*.mp.</li> <li>9. 1 or 2 or 3 or 4 or 5 or 6 or 7 or 8</li> <li>10. pharmacist*.mp.</li> <li>11. community pharmacist*.mp.</li> <li>12. pharmacy.mp.</li> <li>13. 10 or 11 or 12</li> <li>14. 9 and 13</li> </ol> <p><b>Cinahl (1984 to 2022 December) final search</b></p> <ol style="list-style-type: none"> <li>1. atopic dermatitis or eczema or atopic eczema or dermatitis or corticosteroid* or emollient* or antihistamine* or calcineurin inhibitor*</li> <li>2. pharmacist* or community pharmacist* or pharmacy</li> <li>3. S1 and S2</li> </ol> <p><b>PsycInfo (1967 to 2022 December) final search</b></p> <ol style="list-style-type: none"> <li>1. atopic dermatitis.mp. [mp=title, abstract, heading word, table of contents, key concepts, original title, tests &amp; measures, mesh word]</li> <li>2. eczema.mp. [mp=title, abstract, heading word, table of contents, key concepts, original title, tests &amp; measures, mesh word]</li> <li>3. dermatitis.mp. [mp=title, abstract, heading word, table of contents, key concepts, original title, tests &amp; measures, mesh word]</li> <li>4. atopic eczema.mp. [mp=title, abstract, heading word, table of contents, key concepts, original title, tests &amp; measures, mesh word]</li> <li>5. corticosteroid*.mp. [mp=title, abstract, heading word, table of contents, key concepts, original title, tests &amp; measures, mesh word]</li> <li>6. emollient*.mp. [mp=title, abstract, heading word, table of contents, key concepts, original title, tests &amp; measures, mesh word]</li> <li>7. antihistamine*.mp. [mp=title, abstract, heading word, table of contents, key concepts, original title, tests &amp; measures, mesh word]</li> <li>8. calcineurin inhibitor*.mp. [mp=title, abstract, heading word, table of contents, key concepts, original title, tests &amp; measures, mesh word]</li> <li>9. 1 or 2 or 3 or 4 or 5 or 6 or 7 or 8</li> <li>10. pharmacist*.mp. [mp=title, abstract, heading word, table of contents, key concepts, original title, tests &amp; measures, mesh word]</li> <li>11. community pharmacist*.mp. [mp=title, abstract, heading word, table of contents, key concepts, original title, tests &amp; measures, mesh word]</li> <li>12. pharmacy.mp. [mp=title, abstract, heading word, table of contents, key concepts, original title, tests &amp; measures, mesh word]</li> <li>13. 10 or 11 or 12</li> <li>14. 9 and 13</li> </ol> |
|--------------------------------------------------------------------------------------------------------------------------------------------------------------------------------------------------------------------------------------------------------------------------------------------------------------------------------------------------------------------------------------------------------------------------------------------------------------------------------------------------------------------------------------------------------------------------------------------------------------------------------------------------------------------------------------------------------------------------------------------------------------------------------------------------------------------------------------------------------------------------------------------------------------------------------------------------------------------------------------------------------------------------------------------------------------------------------------------------------------------------------------------------------------------------------------------------------------------------------------------------------------------------------------------------------------------------------------------------------------------------------------------------------------------------------------------------------------------------------------------------------------------------------------------------------------------------------------------------------------------------------------------------------------------------------------------------------------------------------------------------------------------------------------------------------------------------------------------------------------------------------------------------------------------------------------------------------------------------------------------------------------------------------------------------------------------------------------------------------------------------------------------------------------------------------------------------------------------------------------------------------------------------------------------------------------------------------------------------------------------------------------------------------------------------------------------------------------------------------------------------------------------------------------------------------------------------------------------------------------------------------------------------------------------------------------------------------------------------------------------------------------------------------------------------------------------------------------|

**Pubmed (1972 to 2022 December) final search**

**Search: ("Dermatitis, Atopic"[Mesh] OR "atopic dermatitis"[tw] OR "eczema"[tw] OR "dermatitis"[tw] OR "atopic eczema"[tw] OR "corticosteroid\*" [tw] OR "emollient\*" [tw] OR "antihistamine\*" [tw] OR "calcineurin inhibitor\*" [tw]) AND ("Pharmacists"[Mesh] OR "Pharmacies"[Mesh] OR "pharmacist\*" [tw] OR "community pharmacist\*" [tw] OR "pharmacy"[tw])**
