# Supplementary material for: Practices and Perceptions of Community Pharmacists in the Management of Atopic Dermatitis: A Systematic Review and Thematic Synthesis
Source: MDPI journal article supplement (doi:10.3390/healthcare11152159), 2023-07-29
Supplement: s1 [file s1]

**Table S2.** Quality assessment of included studies.

| Studies           | Criteria from the Mixed Methods Appraisal Tool |     |     |     |     |     |     |     |     |     |     |     |     |     |     |     |     |     |     |     |     |     |     |     |     |
|-------------------|------------------------------------------------|-----|-----|-----|-----|-----|-----|-----|-----|-----|-----|-----|-----|-----|-----|-----|-----|-----|-----|-----|-----|-----|-----|-----|-----|
|                   | 1.1                                            | 1.2 | 1.3 | 1.4 | 1.5 | 2.1 | 2.2 | 2.3 | 2.4 | 2.5 | 3.1 | 3.2 | 3.3 | 3.4 | 3.5 | 4.1 | 4.2 | 4.3 | 4.4 | 4.5 | 5.1 | 5.2 | 5.3 | 5.4 | 5.5 |
| Abed, 2021        |                                                |     |     |     |     |     |     |     |     |     |     |     |     |     |     | 0   | 0   | 0   | 0   | 1   |     |     |     |     |     |
| Carr, 2009        |                                                |     |     |     |     |     |     |     |     |     | 0   | 1   | 0   | 0   | 1   |     |     |     |     |     |     |     |     |     |     |
| Cowdell, 2011     | 1                                              | 1   | 1   | 1   | 1   |     |     |     |     |     |     |     |     |     |     |     |     |     |     |     |     |     |     |     |     |
| Giua, 2021        |                                                |     |     |     |     |     |     |     |     |     |     |     |     |     |     | 1   | 1   | 1   | 1   | 1   |     |     |     |     |     |
| Hammarstrom, 1995 |                                                |     |     |     |     |     |     |     |     |     | 1   | 1   | 0   | 0   | 1   |     |     |     |     |     |     |     |     |     |     |
| Issa, 2016        |                                                |     |     |     |     |     |     |     |     |     |     |     |     |     |     | 0   | 0   | 1   | 1   | 0   |     |     |     |     |     |
| Jairoun, 2020     |                                                |     |     |     |     |     |     |     |     |     |     |     |     |     |     | 1   | 1   | 1   | 1   | 1   |     |     |     |     |     |
| Kaneko, 2014      |                                                |     |     |     |     |     |     |     |     |     |     |     |     |     |     | 1   | 0   | 1   | 0   | 1   |     |     |     |     |     |
| Koster, 2019      | 1                                              | 1   | 0   | 1   | 1   |     |     |     |     |     |     |     |     |     |     |     |     |     |     |     |     |     |     |     |     |
| Koster, 2021      |                                                |     |     |     |     |     |     |     |     |     | 1   | 1   | 1   | 0   | 1   |     |     |     |     |     |     |     |     |     |     |
| Lambrecht, 2019   |                                                |     |     |     |     |     |     |     |     |     |     |     |     |     |     | 1   | 0   | 0   | 1   | 1   |     |     |     |     |     |
| Lau, 2017         | 1                                              | 1   | 1   | 1   | 1   |     |     |     |     |     |     |     |     |     |     | 1   | 0   | 1   | 0   | 1   | 1   | 1   | 1   | 1   | 0   |
| Lindblad, 2006    | 1                                              | 1   | 1   | 1   | 1   |     |     |     |     |     |     |     |     |     |     |     |     |     |     |     |     |     |     |     |     |
| Manahan, 2011     |                                                |     |     |     |     |     |     |     |     |     |     |     |     |     |     | 0   | 0   | 0   | 1   | 1   |     |     |     |     |     |
| Oishi, 2019       |                                                |     |     |     |     |     |     |     |     |     |     |     |     |     |     | 0   | 0   | 1   | 1   | 1   |     |     |     |     |     |
| Raffin, 2016      |                                                |     |     |     |     |     |     |     |     |     |     |     |     |     |     | 1   | 1   | 1   | 0   | 1   |     |     |     |     |     |
| Salzmann, 2020    |                                                |     |     |     |     |     |     |     |     |     |     |     |     |     |     | 1   | 0   | 0   | 0   | 1   |     |     |     |     |     |
| Smith, 2016       |                                                |     |     |     |     |     |     |     |     |     | 0   | 0   | 1   | 0   | 1   |     |     |     |     |     |     |     |     |     |     |
| Teixeira, 2021    |                                                |     |     |     |     |     |     |     |     |     |     |     |     |     |     | 0   | 1   | 1   | 0   | 1   |     |     |     |     |     |

|                  |   |   |   |   |   |  |  |  |  |  |  |  |  |  |  |   |   |   |   |   |   |   |   |   |   |
|------------------|---|---|---|---|---|--|--|--|--|--|--|--|--|--|--|---|---|---|---|---|---|---|---|---|---|
| Thandar,<br>2019 |   |   |   |   |   |  |  |  |  |  |  |  |  |  |  | 1 | 0 | 1 | 0 | 1 |   |   |   |   |   |
| Tucker,<br>2012  |   |   |   |   |   |  |  |  |  |  |  |  |  |  |  | 1 | 0 | 1 | 0 | 1 |   |   |   |   |   |
| Tucker,<br>2013  |   |   |   |   |   |  |  |  |  |  |  |  |  |  |  | 1 | 0 | 1 | 0 | 1 |   |   |   |   |   |
| Tucker,<br>2017  | 1 | 1 | 1 | 1 | 1 |  |  |  |  |  |  |  |  |  |  | 0 | 0 | 1 | 0 | 1 | 1 | 0 | 1 | 0 | 1 |

### Scores of studies

| <b>Quantitative Studies</b>  | <b>Score<sup>x</sup></b> |
|------------------------------|--------------------------|
| Abed, 2021                   | 1                        |
| Carr, 2009                   | 2                        |
| Giua, 2021                   | 5                        |
| Hammarstrom, 1995            | 3                        |
| Issa, 2016                   | 2                        |
| Jairoun, 2020                | 5                        |
| Kaneko, 2014                 | 3                        |
| Koster, 2021                 | 4                        |
| Lambrecht, 2019              | 3                        |
| Manahan, 2011                | 2                        |
| Oishi, 2019                  | 3                        |
| Raffin, 2016                 | 4                        |
| Salzmann, 2020               | 2                        |
| Smith, 2016                  | 2                        |
| Teixeira, 2021               | 3                        |
| Thandar, 2019                | 3                        |
| Tucker, 2012                 | 3                        |
| Tucker, 2013                 | 3                        |
| <b>Qualitative Studies</b>   | <b>Score<sup>x</sup></b> |
| Cowdell, 2019                | 5                        |
| Koster, 2019                 | 4                        |
| Lindblad, 2006               | 5                        |
| <b>Mixed-Methods Studies</b> | <b>Score<sup>x</sup></b> |
| Lau, 2017                    | 3                        |
| Tucker, 2017                 | 2                        |

<sup>x</sup>0-1= low quality; 2-3= medium quality; 4-5= high quality
