# Supplementary material for: Practices and Perceptions of Community Pharmacists in the Management of Atopic Dermatitis: A Systematic Review and Thematic Synthesis
Source: Healthcare (Basel). 2023 Jul 29;11(15):2159. doi: 10.3390/healthcare11152159 (PMC10418591; doi:10.3390/healthcare11152159)
Supplement: Supplementary file 1 [file healthcare-11-02159-s001.zip]

Archive with 4 entries (4 files):
- Supplementary File S1  - PRISMA_2020_checklist 7.3.pdf
- Supplementary Table S1 (search strategy).pdf
- Supplementary Table S2 (data appraisal tool) (1).pdf
- Supplementary Table S3 (CERQual Full Evidence Profile) (1).pdf
